# Supplementary material for: Printable Newtonian fluid photocatalysts for scale-up solar CO2 conversion
Source: Research Square preprint supplement (doi:10.21203/rs.3.rs-7844074/v1), 2025-10-23
Supplement: Supplementary file 1 [file f6cc5c7a5161e5c396cfe504.docx]

Supporting Information

**Printable Newtonian fluid photocatalysts for scale-up solar CO2 conversion**

Ziyang Lu, Yu Cheng, Yangrui Xu, Liguang Tang, Hongping Li, Tianhua Zhou, Kan Zhang, Weidong Shi


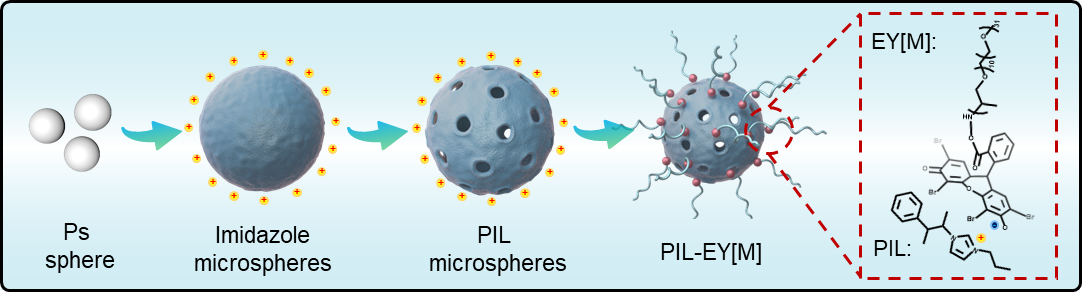


Fig.S1 The preparation process of PIL-EY[M].


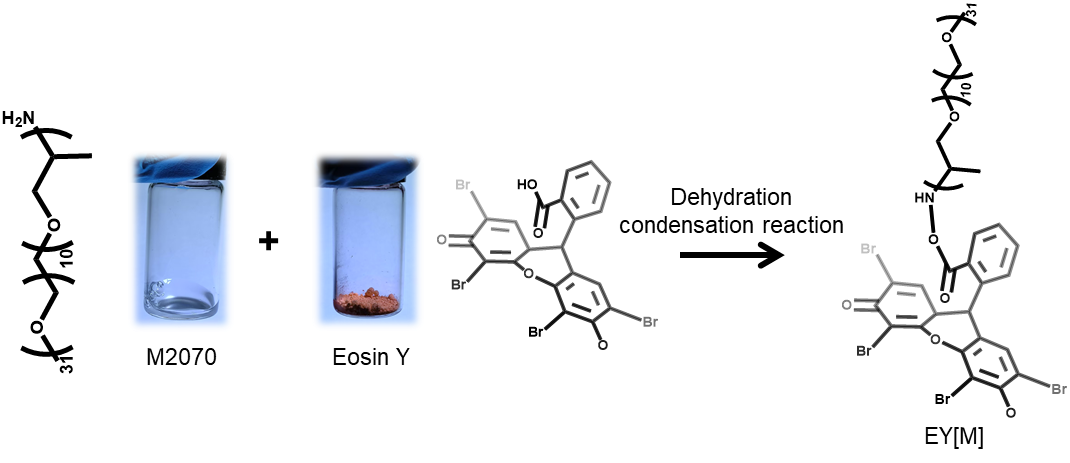


Fig.S2 The preparation process of EY[M] by dehydration condensation reaction.


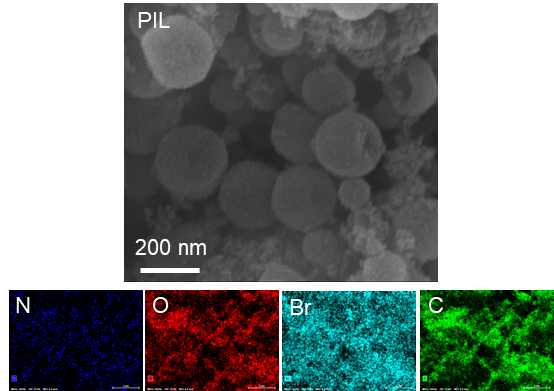


Fig.S3 Search Engine Marketing (SEM) and mapping images of PIL.


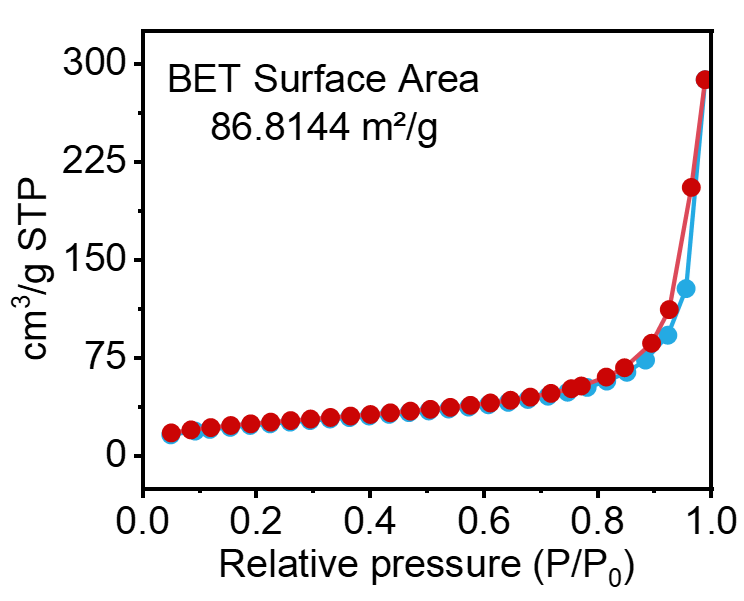


Fig.S4 N2 adsorption-desorption isotherms of PIL.

The PIL hollow sphere has a large specific surface area (86.81 m2/g), and the isotherm is the typical type I, indicating that the PIL has a multi-microporous structure (aperture < 2 nm), which prevents the liquid end of the large volume and long chain from entering the cavity interior.


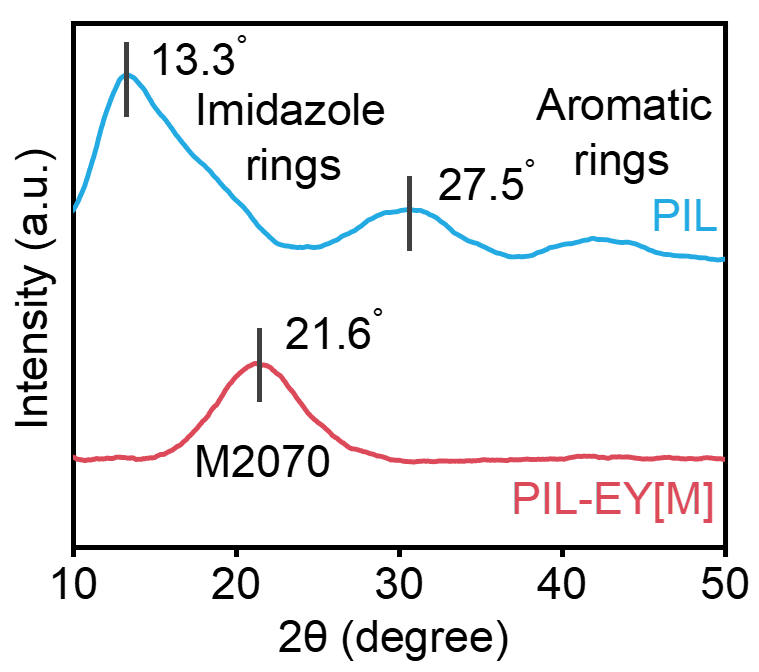


Fig.S5 The X-ray diffraction (XRD) pattern of PIL and PIL-EY[M].


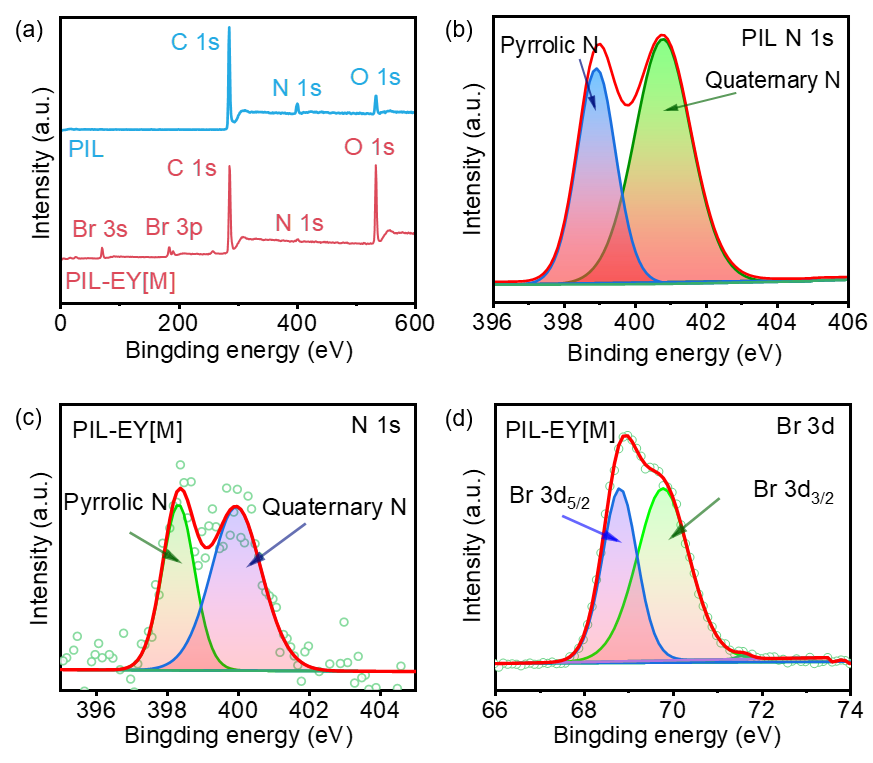


Fig.S6 The X-ray photoelectron spectroscopy (XPS) of PIL and PIL-EY[M].

In addition, the N1s XPS spectra of PIL and PIL-EY[M] showed two peaks at 400.8 eV and 398.9 eV, respectively attributed to the quaternary and pyrrole N of PIL, while the peaks corresponding to Br 3d3/2 and Br 3d5/2 of EY were located at 68.9 eV and 70.4 eV, respectively.


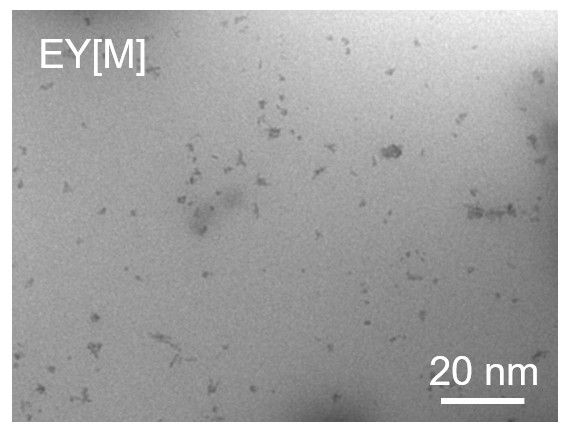


Fig.S7 The TEM image of EY[M].


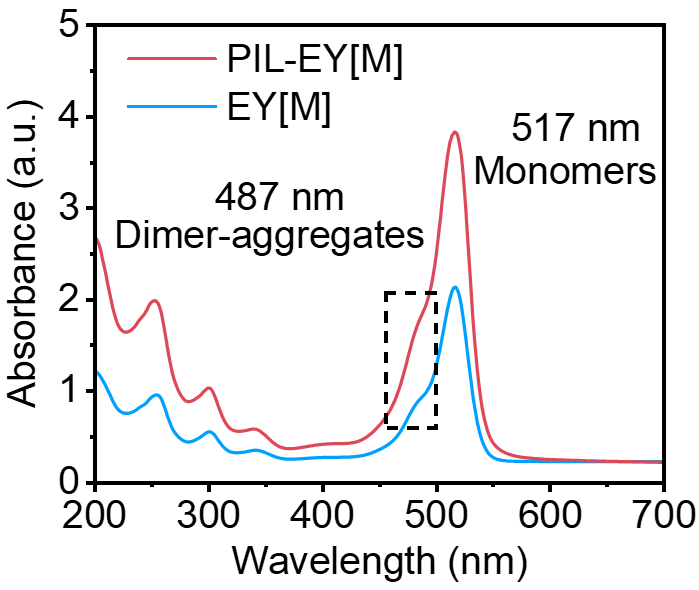


Fig.S8 The UV–Visible absorption spectra of EY[M].

The UV–Visible absorption spectra of EY[M] show peaks at 517 and 487 nm, indicating that the nanoclusters are formed by monomers and aggregates of EY.


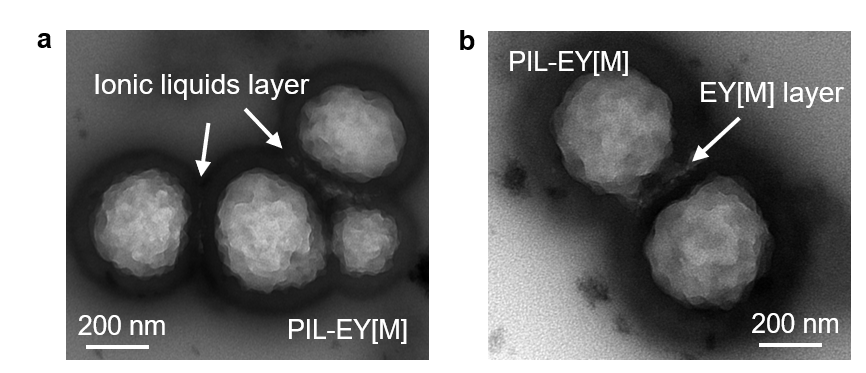


Fig.S9 TEM images of PIL-EY[M].


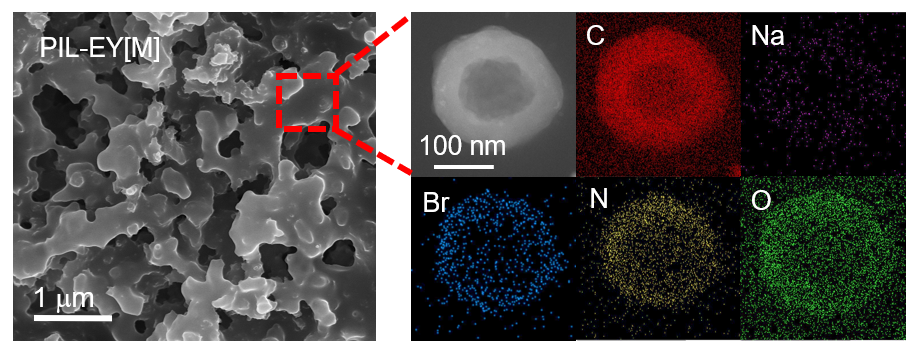


Fig.S10 SEM and high-resolution TEM mapping images of PIL-EY[M].


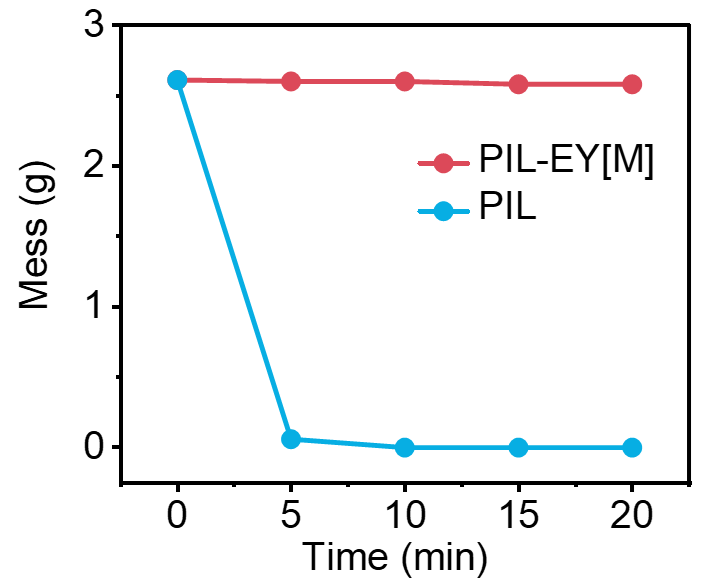


Fig.S11 The photocatalysts mess in a simulated open environment with a 18m/s wind speed.


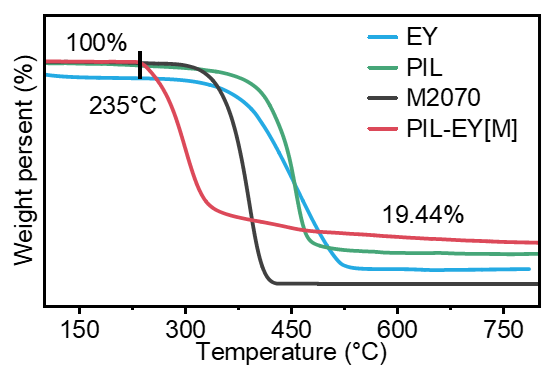


Fig.S12 The thermogravimetric analysis (TGA) of samples.


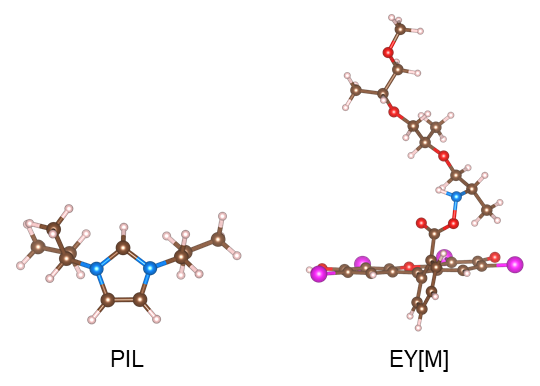


Fig.S13 The DFT calculations model of PIL and EY[M].


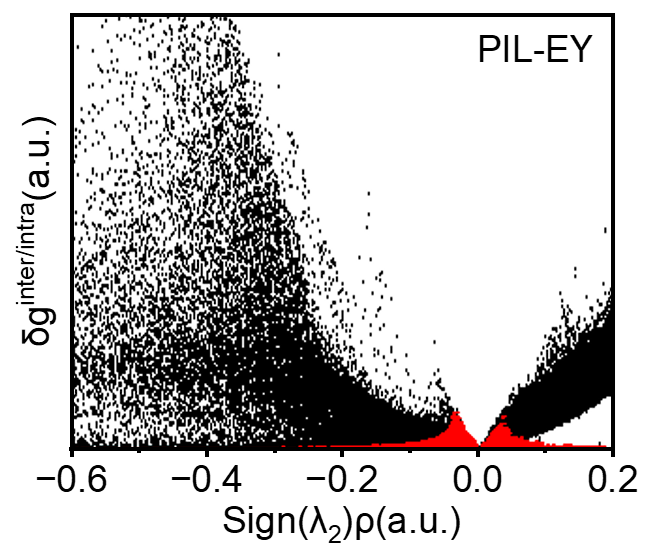


Fig.S14 The IGM analysis of PIL and EY[M].


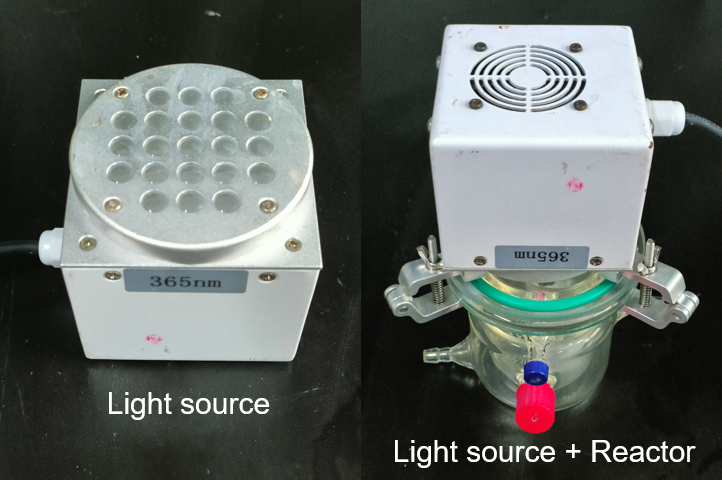


Fig.S15 The light source information of photocatalytic CO2 reduction.


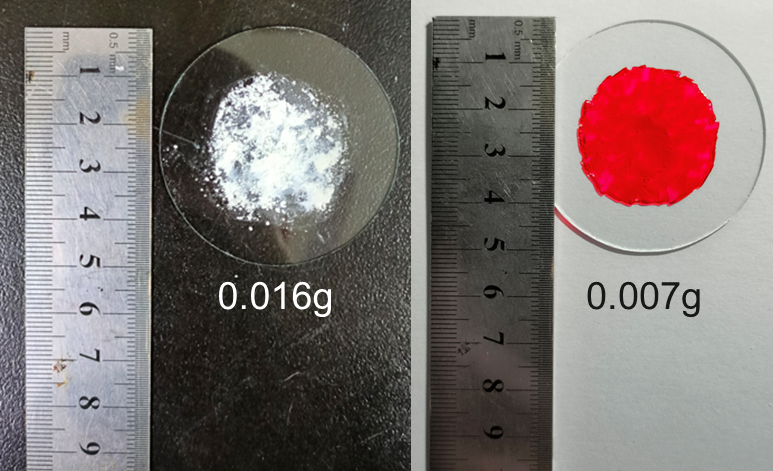


Fig.S16 The PIL and PIL-EY[M] were coated on the surface of the carrier.

Significantly, uniform dispersion on a 1m2 carrier requires the consumption of 5.66g PIL. However, the PIL has a large specific surface area and cavity structure. In comparison, 5.66g of nano-liquid photocatalysts can be evenly applied on a 2.28 m2 carrier, which is less than other commonly used powder photocatalysts, greatly saving catalyst usage costs.


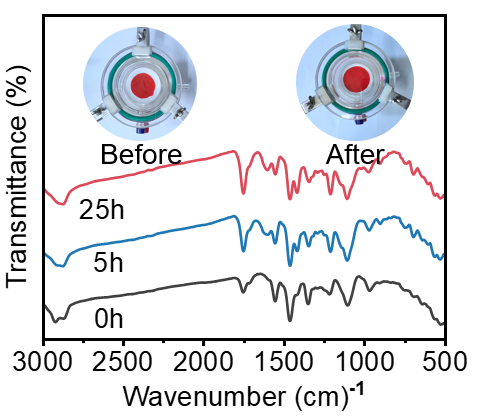


Fig.S17 The FT-IR spectroscopy of PIL-EY[M] before and afterCO2 reduction.


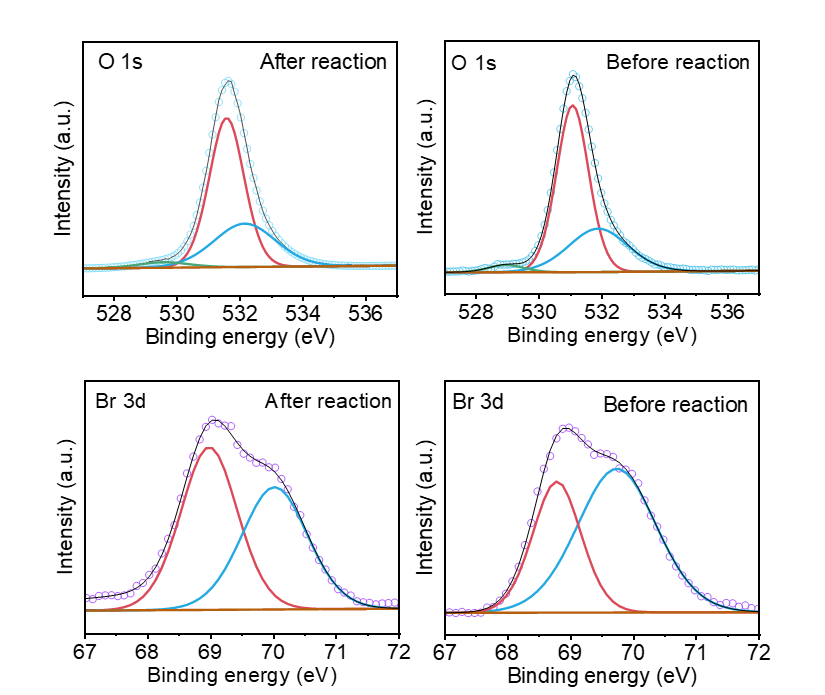


Fig.S18 The XRD spectroscopy of PIL-EY[M] before and afterCO2 reduction.


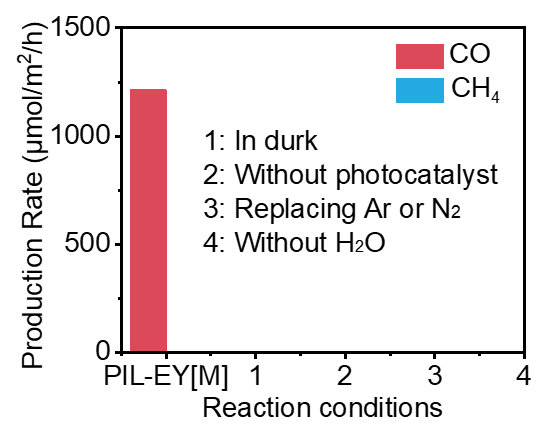


Fig.S19 The CO2 reduction control experiment in different reaction conditions.


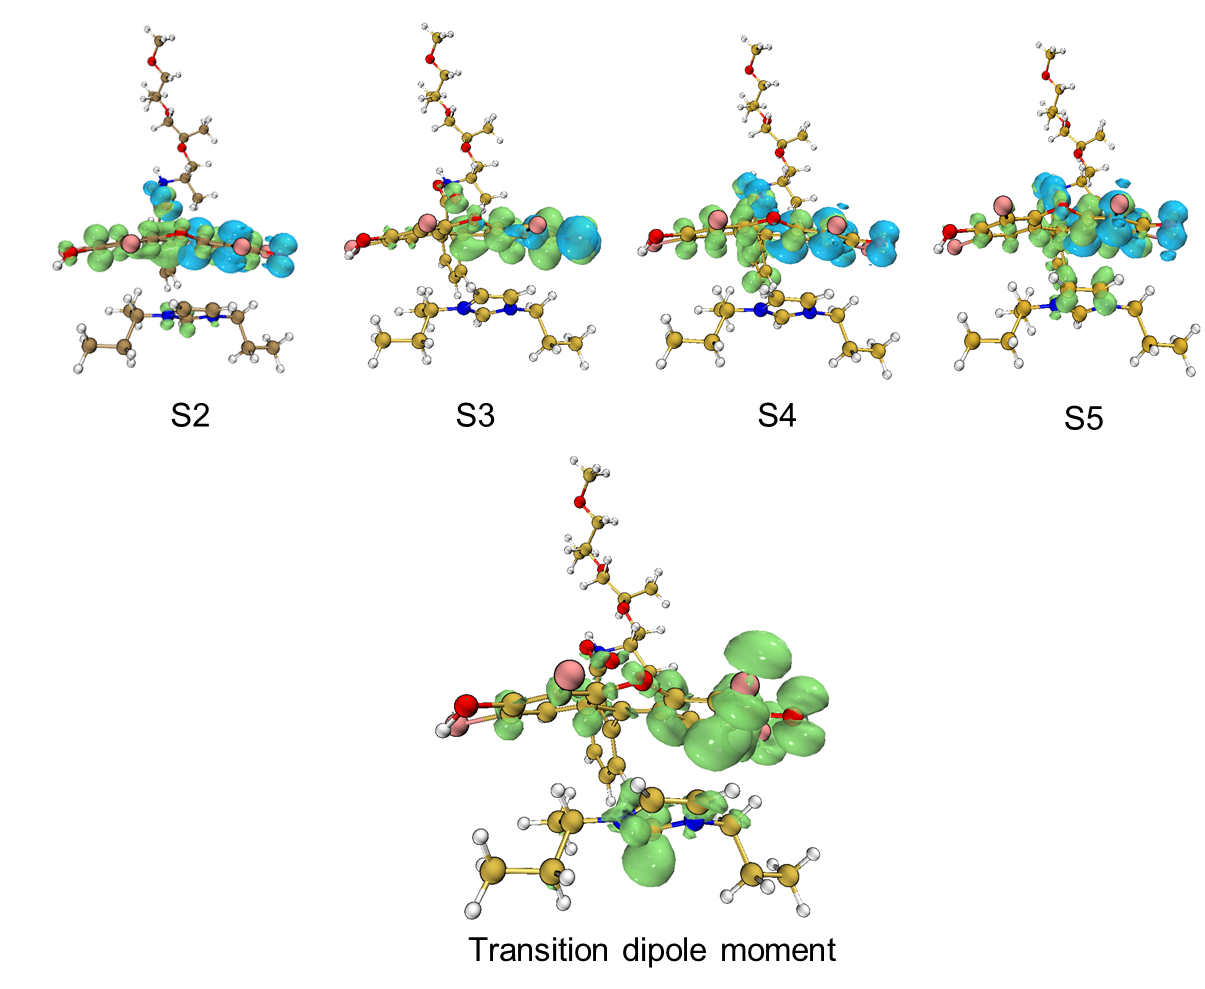


Fig.S20 The TDDFT calculations on the optimized structure of PIL-EY[M].

The electron-hole distribution of the five lowest energy excited states of PIL-EY [M] was calculated using TDDFT. Among them, S2, S3, and S4 have shorter charge transfer distances for local excitation, while S1 and S5 have longer electron-hole center distances for charge transfer excitation.


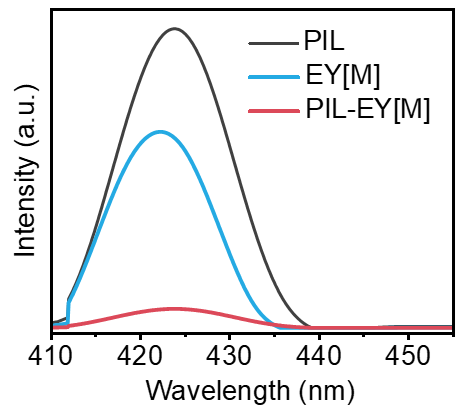


Fig.S21 The PL spectrum of PIL, EY[M] and PIL-EY[M].


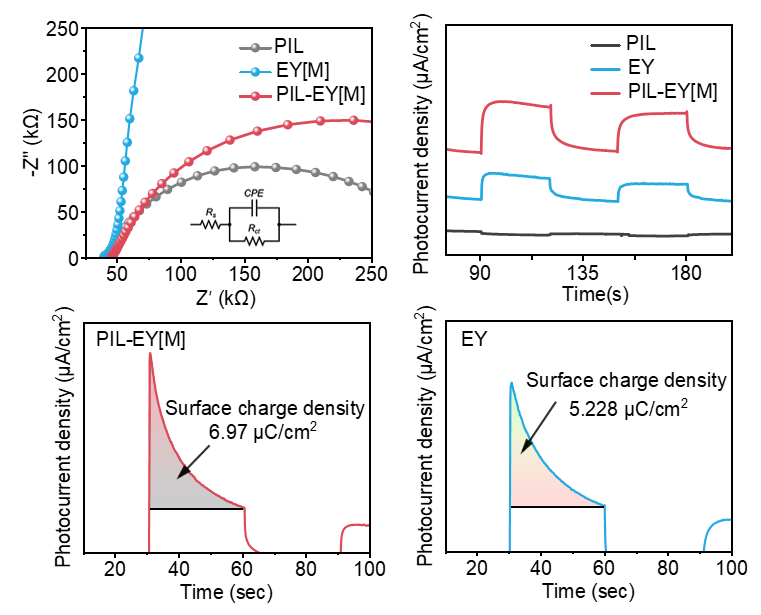


Fig.S22 The electrochemical properties of PIL, EY[M] and PIL-EY[M].


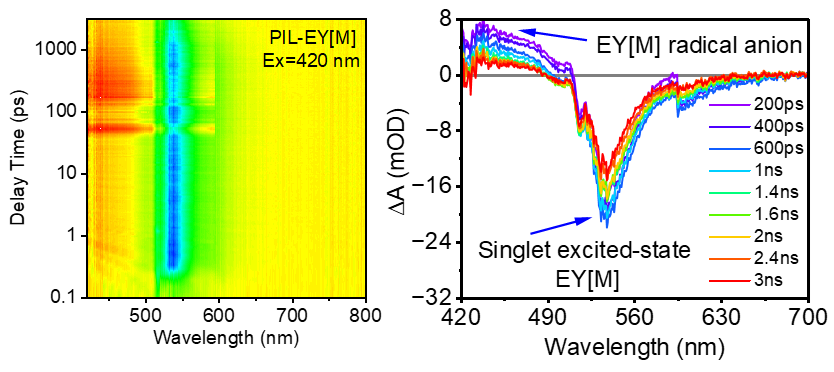


Fig.S23 The TAS spectroscopy of PIL-EY[M].


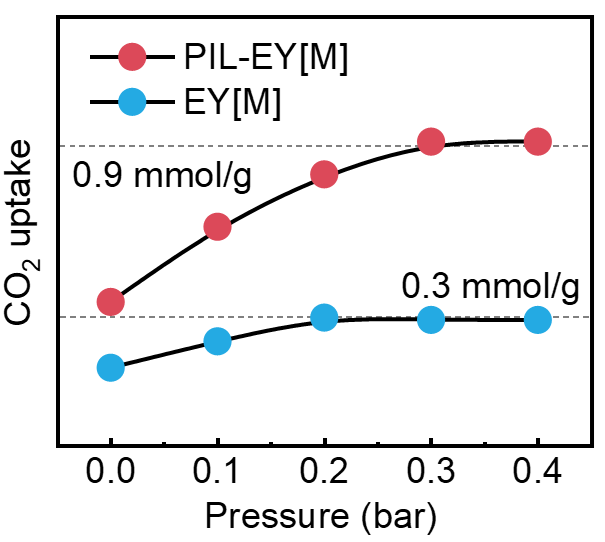


Fig.S24 CO2 uptake experiment of EY[M] and PIL-EY[M].


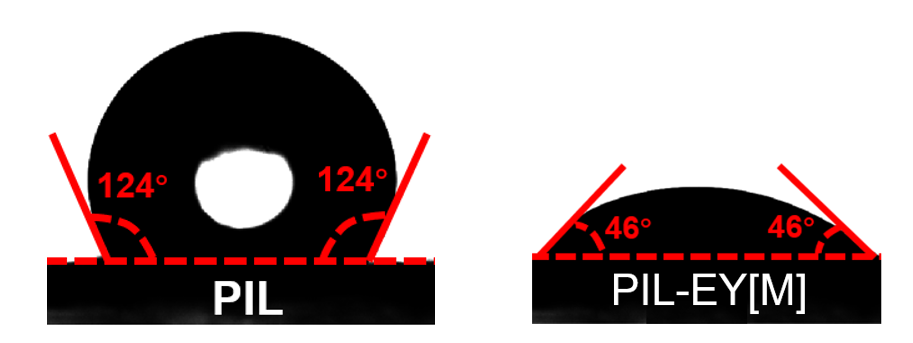


Fig.S25 Water contact angle of PIL and PIL-EY[M].


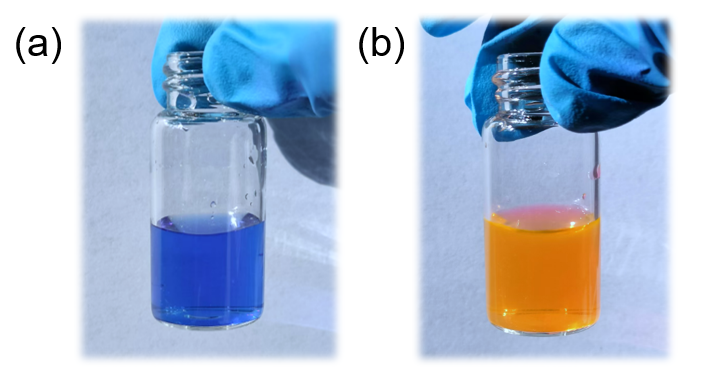


Fig.S26 (a) The thymolphthalein in aqueous solutions. (b) the PIL-EY[M] solutions.


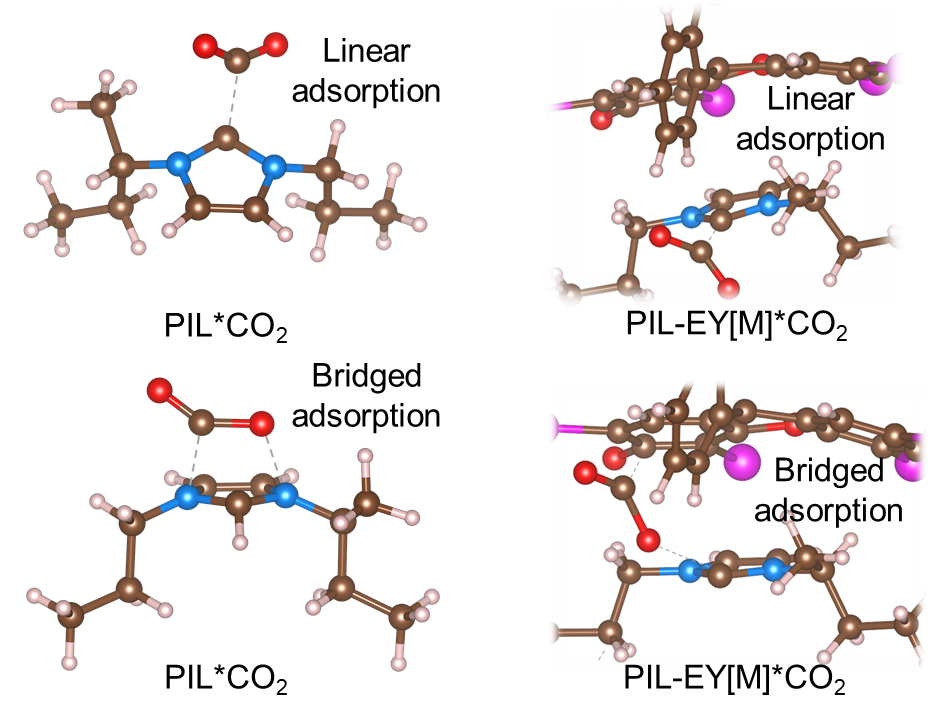


Fig.S27 The bridged and linear adsorption model of PIL and PIL-EY[M].


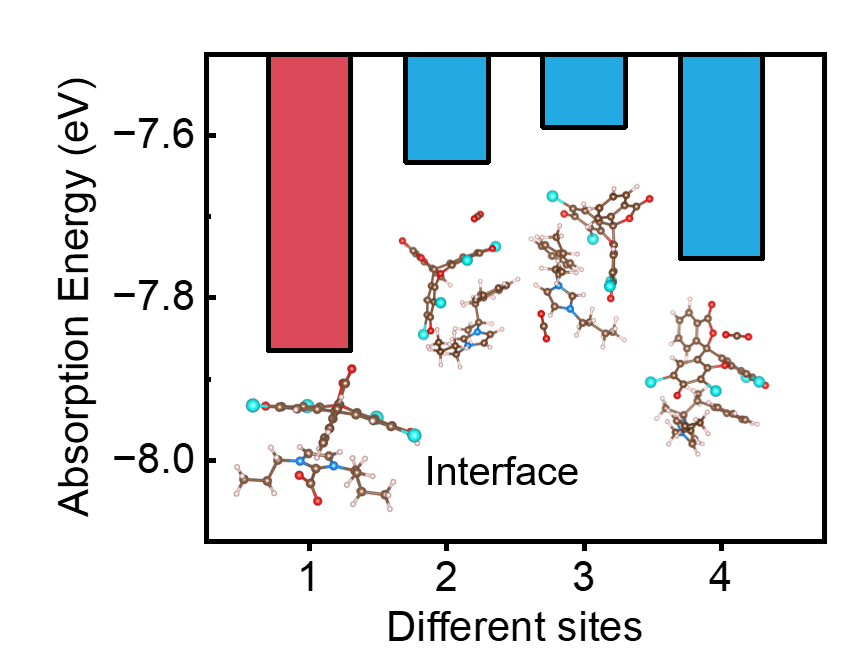


Fig.S28 The adsorption energy of CO2 in different sites.


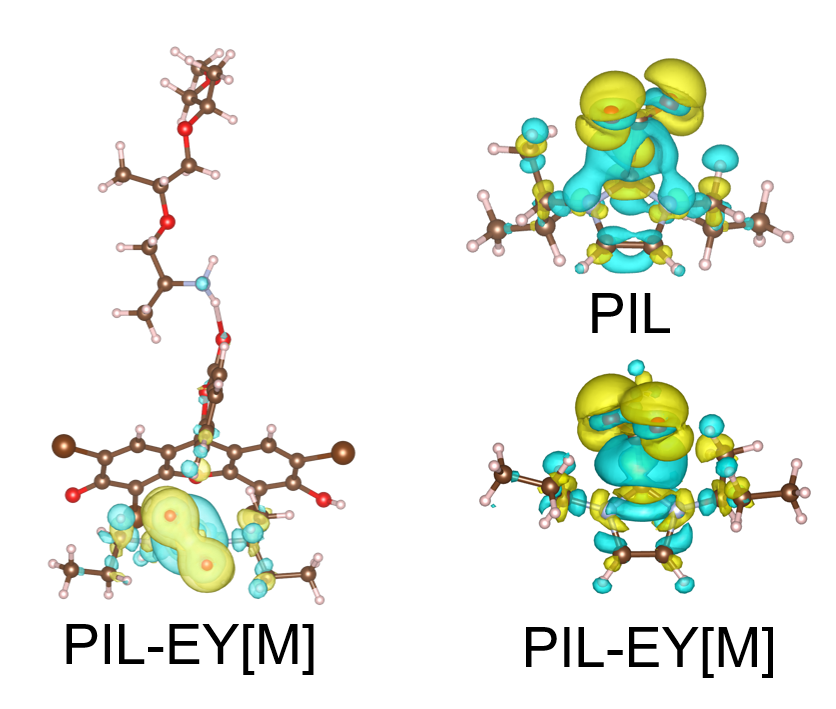


Fig.S29 The differential charge calculations of PIL and PIL-EY[M].

After the adsorption of CO2 by PIL and PIL-EY[M], under the same adsorption mode (linear adsorption), the volume of electron accumulation (yellow) and depletion (blue) of CO2 at the imidazole sites of PIL-EY[M] is larger than that of PIL, indicating that the sites have more electron transfer capacity for CO2 and are more conducive to CO2 conversion.


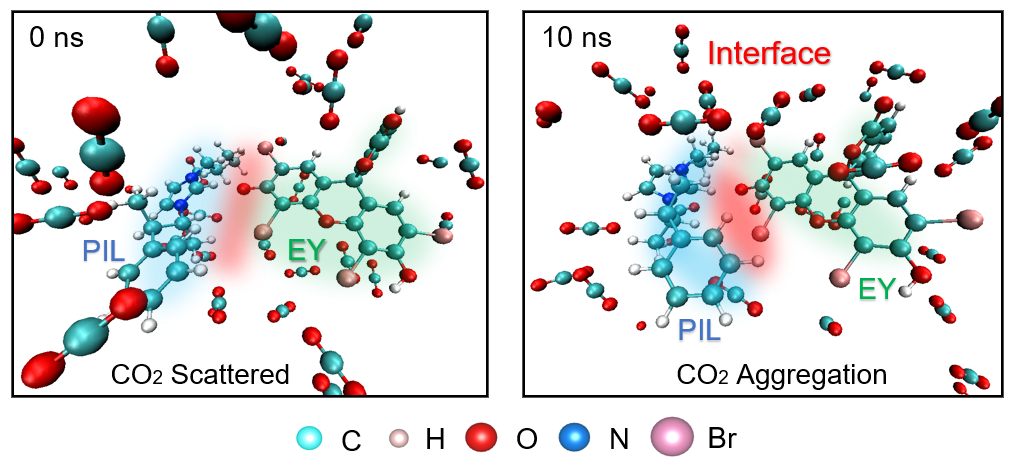


Fig.S30 The CO2 adsorption kinetics of the interface between PIL and EY.

Saturated CO2 molecules are randomly placed into the reaction system to simulate the catalytic environment. 10000 times of kinetic adsorption were simulated, each calculation was set at 1ps, and the adsorption environment changes were recorded at each 1ps. When the simulation was carried out to 10 ns, it was found that the overall energy tended to be balanced, and the scattered CO2 molecules tended to approach the PIL and EY[M] interface.


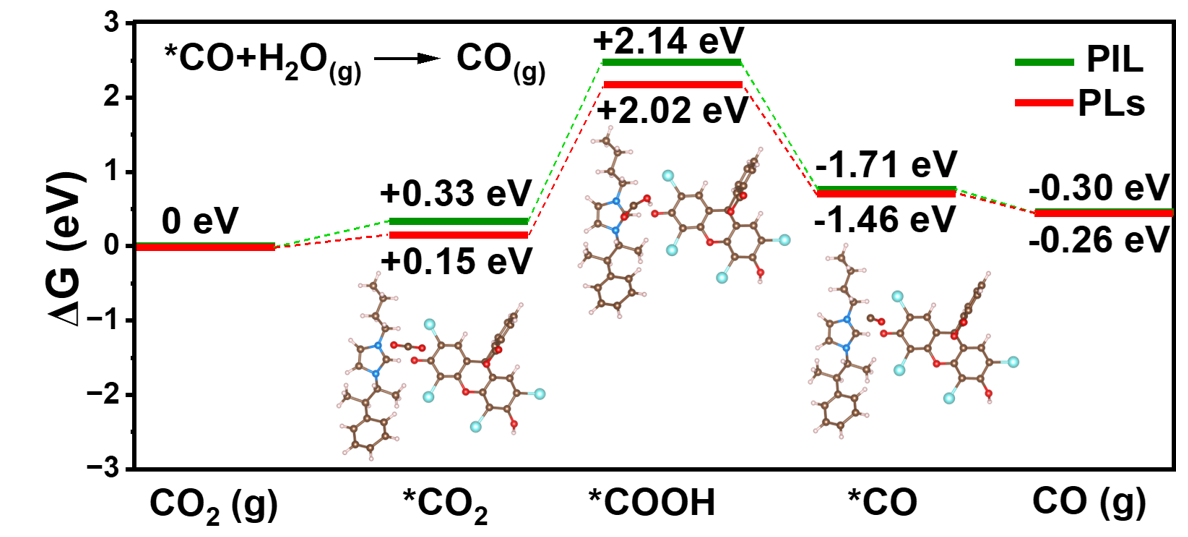


Fig.S31 The Gibbs free energy barriers of PIL and PIL-EY[M].

As shown in Figure, the PIL-EY[M]*CO2 has a smaller energy barrier than PIL*CO2, indicating that the solid-liquid interface is more conducive to the adsorption and activation of CO2. Additionally, the generation energy barrier of *COOH is 2.17 eV, which is smaller than that of PIL. The decrease in the generation barrier indicates that the solid-liquid interface facilitates dynamic charge transfer between the EY adsorption sites and the imidazole reaction sites on the conjugated plane.


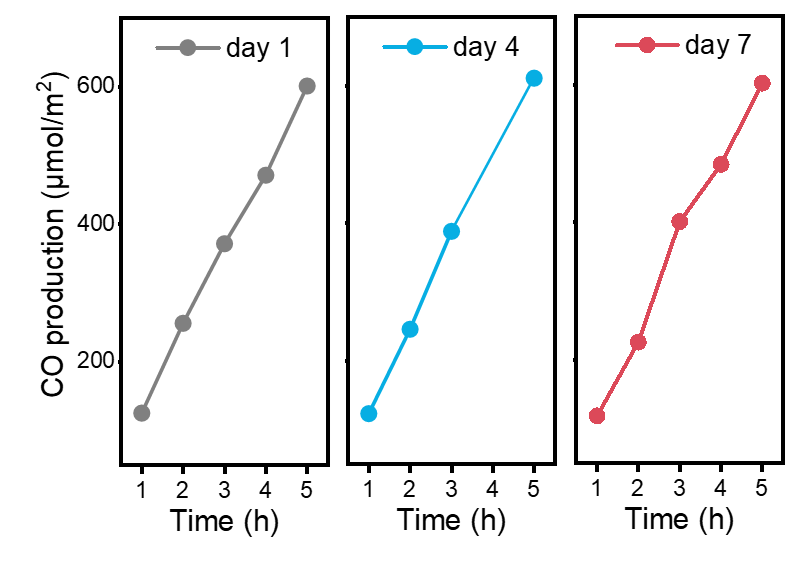


Fig.S32 Continuous experiment for one week in 36L square glass reactor


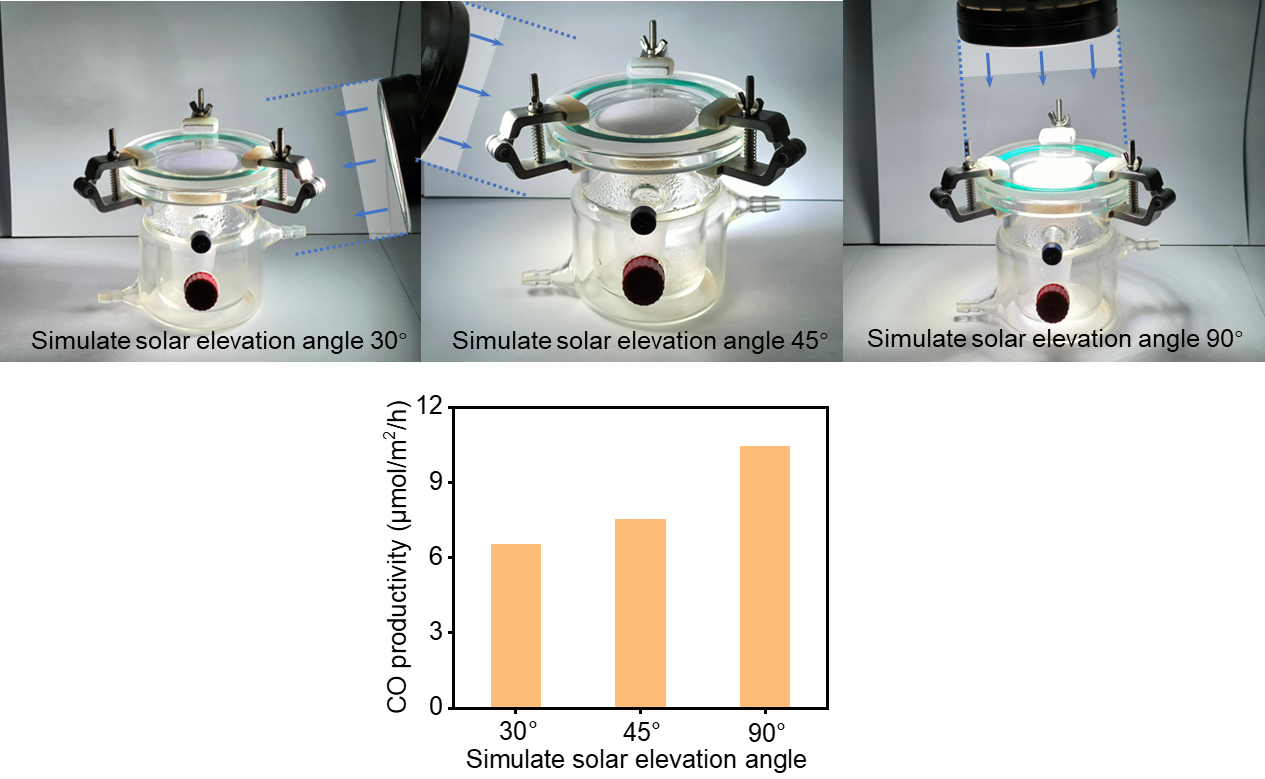


Fig.S33 The performance of PIL in the variation in simulated solar elevation angle alters.

**
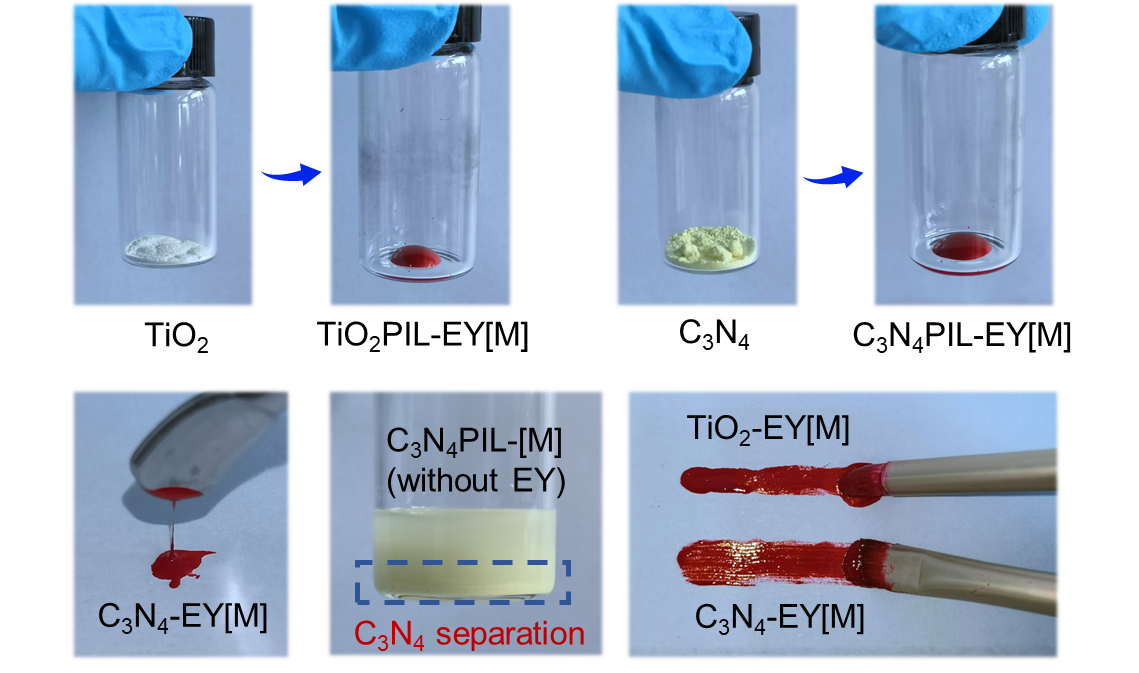
**

Fig.S34 The Optical image of TiO­2PIL-EY[M] and C3N4PIL-EY[M].


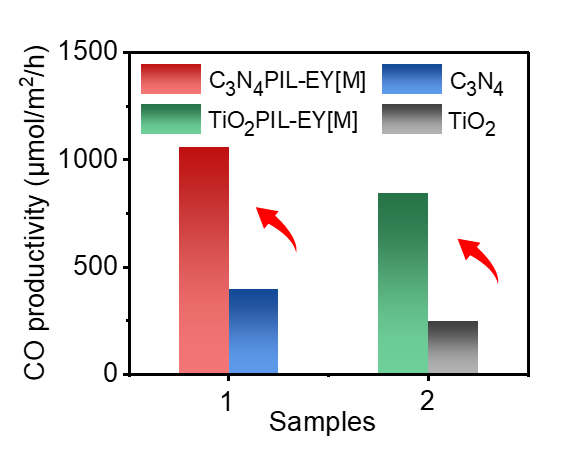


Fig.S35 The CO productivity of TiO­2PIL-EY[M] and C3N4PIL-EY[M].

Tab.S1 The Zeta potential measure results of PIL and EY[M].

| Samples | T | ZP | Mob | Cond |
| --- | --- | --- | --- | --- |
| PIL | 25℃ | +32.6 mV | 2.556 μm cm/Vs | 0.0172 mS/cm |
| 25℃ | +31.7 mV | 2.488 μm cm/Vs | 0.0127 mS/cm |
| 25℃ | +32.8 mV | 2.575 μm cm/Vs | 0.0128 mS/cm |

| Samples | T | ZP | Mob | Cond |
| --- | --- | --- | --- | --- |
| EY[M] | 25℃ | -32.5 mV | -2.545 μm cm/Vs | 0.0226 mS/cm |
| 25℃ | -32.3 mV | -2.529 μm cm/Vs | 0.0220 mS/cm |
| 25℃ | -31.7 mV | -2.486 μm cm/Vs | 0.0268 mS/cm |

Tab.S2 Comparison of performance increased multiplier factors between PIL-EY[M] and similar imidazole photocatalysts and ionic composite photocatalysts.

| Samples | | Properties | Increased multiplier | Ref. |
| --- | --- | --- | --- | --- |
| PIL | | 1228.7 μmol/h/m2 | **57.8 times** | This work |
| Comparison of Imidazole Photocatalysts | ZIF-67/DCD/Ru | 189.9 μmol/h/m2 | **12.2 times** | 1 |
| SmL | 0.7 mmol | **5.5 times** | 2 |
| TiO2/NiIP-NSs | 54.9 mmol/g/h | **4.3 times** | 3 |
| Ni-TCPP-TPyP | 309.3 μmol/g/h | **11.1 times** | 4 |
| 3DOM Co-SNS | 347.3 μmol/h | **8.0 times** | 5 |
| PFC-73-Ni/Cu/Zn | 14.7 μmol/g/h | **1.5 times** | 6 |
| 3DOM Ag2S-CoOx/NC | 66.0 μmol/g/h | **1.8 times** | 7 |
| Comparison of ion composite photocatalysts | Cu/a-In2O3 NSs | 798.7 μmol/g/h | **5.8 times** | 8 |
| TiO2/CsPbBr3 | 23.9 μmol/g/h | **1.8 times** | 9 |
| ZnSe-CsSnCl3 | 57 μmol/g/h | **5.0 times** | 10 |
| [Co(qpy)(OH2)2]2+ | 11.6 μmol | **13.0 times** | 11 |
| [Fe(qpy)(OH2)2](ClO4)2 | 62.5 μmol | **7.4 times** | 12 |
| PRGO/TP-COF | 48.8 μmol/g | **1.7 times** | 13 |
| IL/Co-bCN | 20.6 μmol/g/h | **42.0 times** | 14 |

Tab.S3 Comparison of performance increased multiplier factors between PIL-EY[M] and different types of photocatalysts.

| Prinstin  materials | Modified materials | Improvement approach | Catalytic methods | Selectivity | Increased multiplier | Ref. |
| --- | --- | --- | --- | --- | --- | --- |
| PIL | PIL-EY[M] | Nano-liquid | Photocatalysts | 100% | **57.8 times** | This work |
| Ru/MnOx | Ru/(TiOx)MnO | Oxide surface patches | Selective hydrogenation catalysts | / | **3.3 times** | 15 |
| Planar-Cu | Cu-DAC | Atomic-level Cu active sites | Electroreduction | / | **~2.3 times** | 16 |
| CuCO | CuCO2 | Distinct Cu sites | Electroreduction | / | **6.0 times** | 17 |
| MnOx | Ru/MnOx | Metal-support interaction | Photo-thermal coupling | 99.5% | **29.0 times** | 18 |
| PCN-250-Fe2Co | ILs@MOFs | New type of host-guest | Photocatalysts | 100% | **25.5 times** | 19 |
| Ag/TiO2 | Cu-Ag/TiO2 | Cu–Ag alloy synergistic effect | Photocatalysts | 49.1 | **~40.0 times** | 20 |
| CuIn5S8 | VS-CuIn5S8 | Cu–In dual sites | Photocatalysts | 100% | **5.4 times** | 21 |
| Cu-HITP + [Ru(phen)3] 2+, | Ru@Cu-HHTP | Electrostatic Attraction-Driven | Photocatalysts | CO | **13.1 times** | 22 |
| CMP-nBr | CMP-nTB | Intramolecular Electric Field | Photocatalysts | 85.7 | **9.2 times** | 23 |
| COF-5 | LaNi-Phen/COF-5 | La-Ni bimetallic sites | Photocatalysts | 98.2 | **15.2 times** | 24 |
| Ni2+ without CB | CB[7]:Ni 1:4 | Engineering Single Ni Sites | Photocatalysts | 97.9 | **12.1 times** | 25 |
| p-CSON | c-CSON | Accessing parity-forbidden d-d transitions | Photocatalysts | 84.23 | **1.2 times** | 26 |
| CCH | Cu-CCH | Dual Jahn–Teller Sites | Photocatalysts | 92.62 | **4.2 times** | 27 |
| BFO | BFO-SF40 | Strain Engineering | Photocatalysts | 100 | **12.8 times** | 28 |

**Reference**

1. Dai, F.*, et al.* Highly efficient CO2 photoreduction by ultralow-Ru-Loading ZIF-67. *Appl. Catal., B* **336**, 122934 (2023).

2. Bhimpuria, R., Tomar, M., Thapper, A., Ahlquist, M.&Borbas, K. E. Photocatalytic product-selective reduction of CO2, CO, and carbonates. *Chem*, 10.1016/j.chempr.2025.102450.

3. Wu, C.*, et al.* Highly Efficient Photocatalytic CO2-to-CO on Ni-Based Cationic Polymer with TiO2-Assisted Exfoliation and Stabilization. *Angew. Chem., Int. Ed.* **64**, e202423200 (2025).

4. Zhang, Y.*, et al.* Precisely Constructing Molecular Junctions in Hydrogen-Bonded Organic Frameworks for Efficient Artificial Photosynthetic CO2 Reduction. *Angew. Chem., Int. Ed.* **63**, e202413131 (2024).

5. Lyu, W., Liu, Y., Chen, D., Wang, F.&Li, Y. Engineering the electron localization of metal sites on nanosheets assembled periodic macropores for CO2 photoreduction. *Nat. Commun.* **15**, 10589 (2024).

6. Yin, Q.*, et al.* Metallization-Prompted Robust Porphyrin-Based Hydrogen-Bonded Organic Frameworks for Photocatalytic CO2 Reduction. *Angew. Chem., Int. Ed.* **61**, e202115854 (2022).

7. Mo, S.*, et al.* Hierarchically ordered microporous Ag2S QDs-CoOx/NC nanostructures for enhancing photocatalytic CO2 reduction to chemical fuels. *Fuel* **358**, 130113 (2024).

8. Pan, R.*, et al.* Amorphization-Induced Cation Exchange in Indium Oxide Nanosheets for CO2-to-Ethanol Conversion. *Nano Lett.* **23**, 10004-10012 (2023).

9. Xu, F.*, et al.* Unique S-scheme heterojunctions in self-assembled TiO2/CsPbBr3 hybrids for CO2 photoreduction. *Nat. Commun.* **11**, 4613 (2020).

10. Li, N.*, et al.* ZnSe Nanorods–CsSnCl3 Perovskite Heterojunction Composite for Photocatalytic CO2 Reduction. *ACS Nano* **16**, 3332-3340 (2022).

11. Ho, P.-Y.*, et al.* Light-Driven Reduction of CO2 to CO in Water with a Cobalt Molecular Catalyst and an Organic Sensitizer. *ACS Catal.* **13**, 5979-5985 (2023).

12. Wang, J.-W.*, et al.* Homoleptic Al(III) Photosensitizers for Durable CO2 Photoreduction. *J. Am. Chem. Soc* **145**, 676-688 (2023).

13. Liu, Y., Wang, Y., Shang, J., Peng, J.&Zhu, T. Construction of a novel metal-free heterostructure photocatalyst PRGO/TP-COF for enhanced photocatalytic CO2 reduction. *Appl. Catal. B Environ.* **350**, 123937 (2024).

14. Liu, Y.*, et al.* Improving CO2 photoconversion with ionic liquid and Co single atoms. *Nat. Commun.* **14**, 1457 (2023).

15. Kang, H.*, et al.* Generation of oxide surface patches promoting H-spillover in Ru/(TiOx)MnO catalysts enables CO2 reduction to CO. *Nat. Catal.* **6**, 1062-1072 (2023).

16. Fan, L.*, et al.* Atomic-level Cu active sites enable energy-efficient CO2 electroreduction to multicarbon products in strong acid. *Nat. Synth.* **4**, 262-270 (2025).

17. Gao, W., Xu, Y., Fu, L., Chang, X.&Xu, B. Experimental evidence of distinct sites for CO2-to-CO and CO conversion on Cu in the electrochemical CO2 reduction reaction. *Nat. Catal.* **6**, 885-894 (2023).

18. Zhai, J.*, et al.* Photo-thermal coupling to enhance CO2 hydrogenation toward CH4 over Ru/MnO/Mn3O4. *Nat. Commun.* **15**, 1109 (2024).

19. Wang, Y.*, et al.* Artificial photosynthetic system for diluted CO2 reduction in gas-solid phase. *Nat. Commun.* **15**, 8818 (2024).

20. Yu, Y., He, Y., Yan, P., Wang, S.&Dong, F. Boosted C–C coupling with Cu–Ag alloy sub-nanoclusters for CO2-to-C2H4 photosynthesis. *Proc. Natl. Acad. Sci. U. S. A.* **120**, e2307320120 (2023).

21. Li, X.*, et al.* Selective visible-light-driven photocatalytic CO2 reduction to CH4 mediated by atomically thin CuIn5S8 layers. *Nat. Energy* **4**, 690-699 (2019).

22. Huang, N.-Y.*, et al.* Electrostatic Attraction-Driven Assembly of a Metal–Organic Framework with a Photosensitizer Boosts Photocatalytic CO2 Reduction to CO. *J. Am. Chem. Soc* **143**, 17424-17430 (2021).

23. Tang, Z.*, et al.* Reaction Site Designation by Intramolecular Electric Field in Tröger's-Base-Derived Conjugated Microporous Polymer for Near-Unity Selectivity of CO2 Photoconversion. *Adv. Mater.* **35**, 2210693 (2023).

24. Zhou, M.*, et al.* Photocatalytic CO2 reduction using La-Ni bimetallic sites within a covalent organic framework. *Nat. Commun.* **14**, 2473 (2023).

25. Wang, J.*, et al.* Engineering Single Ni Sites on 3D Cage-like Cucurbit[n]uril Ligands for Efficient and Selective CO2 Photocatalytic Reduction. *Angew. Chem., Int. Ed.* **64**, e202417384 (2025).

26. Li, X.*, et al.* Accessing parity-forbidden d-d transitions for photocatalytic CO2 reduction driven by infrared light. *Nat. Commun.* **14**, 4034 (2023).

27. Liu, H.*, et al.* Construction of Asymmetrical Dual Jahn–Teller Sites for Photocatalytic CO2 Reduction. *Angew. Chem., Int. Ed.* **62**, e202304562 (2023).

28. Zhou, G.*, et al.* Enhancing d/p-2π* Orbitals Hybridization via Strain Engineering for Efficient CO2 Photoreduction. *Angew. Chem., Int. Ed.* **63**, e202411794 (2024).
